# Supplementary material for: Artificial Intelligence: A Blessing or a Threat for Language Service Providers in Portugal
Source: MDPI journal article supplement (doi:10.3390/informatics10040081), 2023-10-23
Supplement: s1 [file s1]

## **File S1: Questionnaire**

### **1) Gender**

- Feminine
- Male
- Non-binary
- I prefer not to answer

### **2) Age**

### **3) Country of residence**

- Portugal
- Spain
- Other

### **4) Professional occupation:**

- Freelance Translator (full time)
- Freelance Translator (part time)
- In-house translator
- Project Manager
- Translation agency owner
- Interpreter
- Editor/Proofreader
- Subtitler/ Captioner
- Localizer
- Other

### **5) How many years of professional experience?**

### **6) Education**

- Less than high school
- High school graduate
- Some college or vocational training
- University/College non-completion
- Bachelor's degree
- Advanced degree (Master's, Ph.D.)

#### **6.1) In which area?**

### **7) Are you familiar with the use of Artificial Intelligence in language-related areas (translation, interpretation, etc.)?**

- Not at all
- Slightly familiar
- Moderately familiar
- Very familiar
- Extremely familiar

**8) To the best of your knowledge, are the following programmes supported by artificial intelligence and/or automatization tools?**

- ChatGPT (AI | Automation | Both | None | I don't know)
- DeepL (AI | Automation | Both | None | I don't know)
- Google Translate (AI | Automation | Both | None | I don't know)
- Microsoft Translator (AI | Automation | Both | None | I don't know)
- SmartCat (AI | Automation | Both | None | I don't know)
- Trados Studio (AI | Automation | Both | None | I don't know)
- MemoQ (AI | Automation | Both | None | I don't know)
- Phase (AI | Automation | Both | None | I don't know)
- Wordfast (AI | Automation | Both | None | I don't know)

**9) How often do you use neural machine translation? (e.g. Google Translate, DeepL, etc.)?**

- Never - 0%
- Rarely - Up to 25%
- Sometimes- Between 26% and 50%
- Often - Between 51% and 75%
- Very often - Between 76% and 99%
- Always - 100%

**9.1) Why do you use Neural Machine Translation? Select the statements that apply to you:**

- Speed
- Provides translation results appropriate to the message
- I prefer to focus my efforts on pre and post translation activities (proofreading for terms, grammar, style, etc.)
- Provides a better translation than I would
- Allows me to understand the text in a generic way
- Works as a starting point for my translation
- It is useful for short text excerpts
- It is useful for more difficult passages of text
- It is useful for texts with few cultural/contextual aspects
- It is useful when I need to translate into a foreign language
- It is useful when I need to translate into my mother tongue
- Other (specify)

**10) How often do you use language models (e.g. ChatGPT)?**

- Never - 0%
- Rarely - Up to 25%
- Sometimes- Between 26% and 50%
- Often - Between 51% and 75%
- Very often - Between 76% and 99%
- Always - 100%

**10.1) Why do you use Language models (chatGPT, etc.)? Select the statements that apply to you:**

- I use it to comprehend cultural references
- I use it to comprehend specific terminology
- I use to obtain more translation options
- It use it to save research time in general
- Other (specify)

**11) Do you think AI tools are useful for your work?**

- Not at all
- Slightly useful
- Moderately useful
- Very useful
- Extremely useful

**11.1) Why?**

- Speed
- Efficiency
- Good value for money
- Other (specify)

**11.2) why not?**

- Lack of precision and quality
- Lack of contextual understanding
- Lack of confidentiality guarantee
- other

**12) How do you feel about the way AI influences translation-related tasks**

- Translation of general topics (Very Negative | Negative | I don't have an opinion | Neutral Positive | Very Positive)
- Technical/specific translations (Very Negative | Negative | I don't have an opinion | Neutral Positive | Very Positive)
- Revision (Very Negative | Negative | I don't have an opinion | Neutral Positive | Very Positive)
- Post-editing (Very Negative | Negative | I don't have an opinion | Neutral Positive | Very Positive)
- Subtitling (Very Negative | Negative | I don't have an opinion | Neutral Positive | Very Positive)
- Interpreting (Very Negative | Negative | I don't have an opinion | Neutral Positive | Very Positive)
- Transcription (Very Negative | Negative | I don't have an opinion | Neutral Positive | Very Positive)
- Terminology management (Very Negative | Negative | I don't have an opinion | Neutral Positive | Very Positive)
- Other (specify) (Very Negative | Negative | I don't have an opinion | Neutral Positive | Very Positive)

**13) Do you believe that there are other language tasks related to translation/interpreting that will be impacted by AI?**

(open answer)

**14) How do you feel AI will influence the language services market in the future?**

- Very Negatively – I believe that AI will have a highly negative impact on the language services market, which may include the devaluation of language professionals, loss of linguistic nuances, or an erosion of the human touch in language services.
- Negatively - I foresee potential drawbacks, such as job displacement, reduced demand for human translators and interpreters, or a decrease in the quality of language services.
- Neutral - It can bring both opportunities and challenges to the market.
- Positively - I foresee benefits such as increased productivity, streamlined processes, and the ability to handle larger volumes of content.

- Very Positively - I believe it will bring significant advancements, such as greater efficiency, better quality, and more opportunities for language professionals.

**15)** According to a recent study large language models (LLMs) based on artificial intelligence (AI), such as ChatGPT may have potential implications on the job market. That same study identified Interpreters and Translators as one of the main job occupations with a greater exposure to AI in the US job market (76.5%).

**According to your experience in the field what are your thoughts regarding this for Portugal?**
